# Supplementary material for: De novo synthesis of hepatitis B virus nucleocapsids is dispensable for the maintenance and transcriptional regulation of cccDNA
Source: PubMed Central journal article supplement — JHEP Rep. 2020 Oct 14;3(1):100195. doi: 10.1016/j.jhepr.2020.100195 (PMC7771110; doi:10.1016/j.jhepr.2020.100195), 2020-10-14
Supplement: mmc1.pdf [file mmc1.pdf]

***De novo* synthesis of hepatitis B virus nucleocapsids is  
dispensable for the maintenance and transcriptional regulation of  
cccDNA**

Thomas Tu, Benno Zehnder, Bingqian Qu, Stephan Urban

Table of contents

|                                |   |
|--------------------------------|---|
| Fig. S1 .....                  | 2 |
| Fig. S2 .....                  | 3 |
| Fig. S3 .....                  | 4 |
| Fig. S4 .....                  | 5 |
| Supplementary references ..... | 6 |

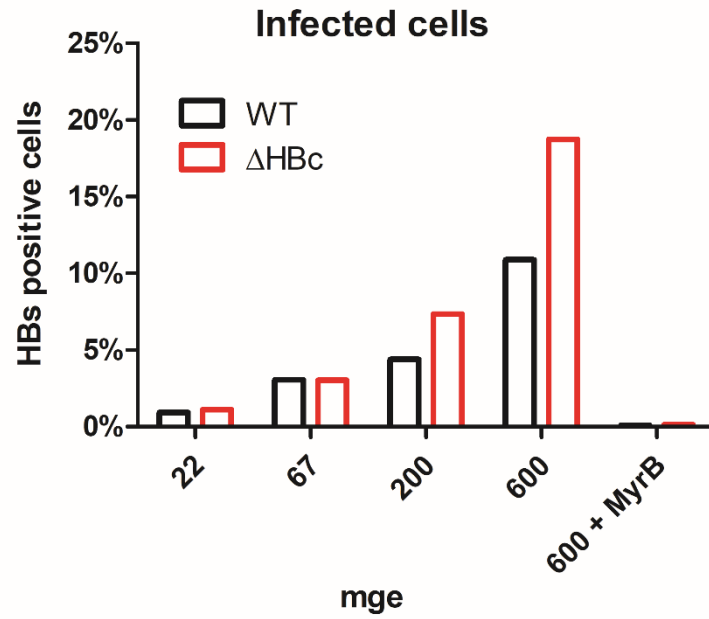

**Fig. S1. Quantification of HBs-positive cells**

HepG2-NTCP cells were infected with WT (black) or  $\Delta$ HBc (red) HBV with increasing mge. Infection rates were determined by immunofluorescence for HBs, followed by quantification of HBs-positive cells using ilastik software [1].

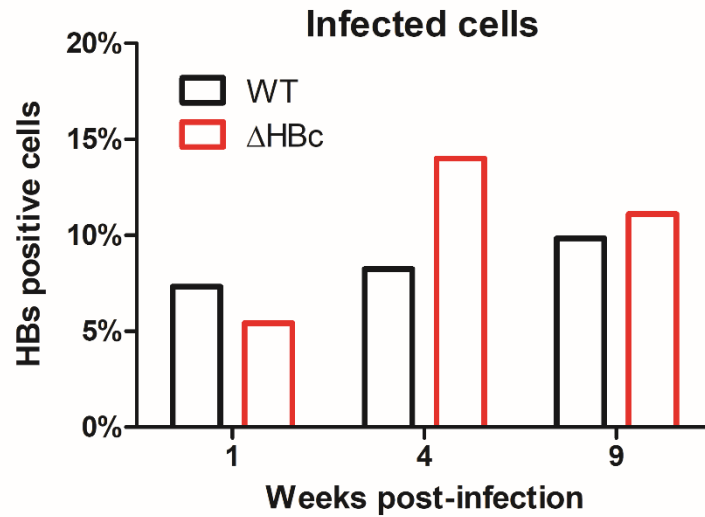

**Fig. S2. Quantification of HBs-positive HepG2-NTCP cells in long-term infection**

HepG2-NTCP cells were infected with WT (black) or  $\Delta$ HBc (red) HBV at mge 40. Cells were fixed 1, 4, and 9 weeks post infection and infection rates were determined by immunofluorescence for HBs, followed by quantification of HBs-positive cells using ilastik software [1].

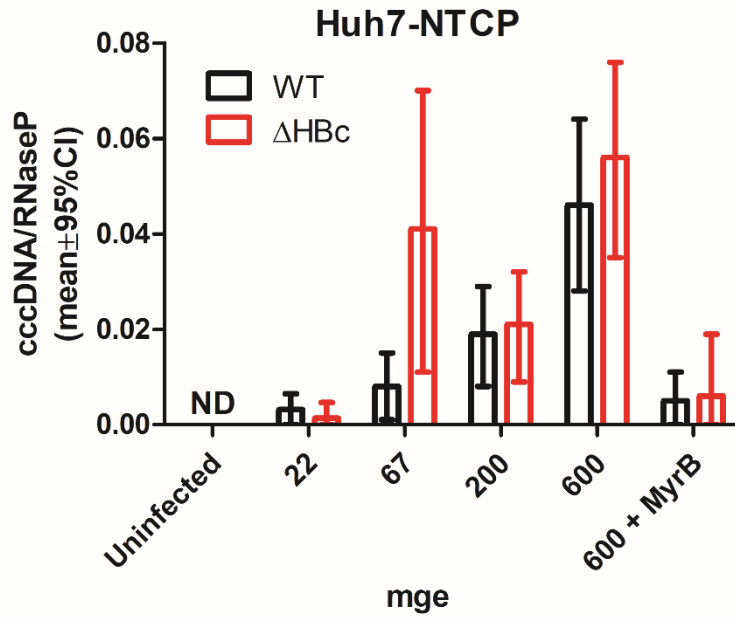

**Fig. S3. HBc expression is not required for the establishment of HBV cccDNA in Huh7-NTCP cells**

Huh7-NTCP cells were infected with WT (black) or  $\Delta$ HBc (red) HBV with increasing inoculating doses. Total cellular DNA extracted at 7dpi was analysed by cinqPCR to detect cccDNA levels relative to the single-copy cellular gene RNaseP. The error bars (Poisson 95% confidence interval) represent the technical error of the ddPCR assay. No significant differences in cccDNA levels were detected between WT and  $\Delta$ HBc HBV-infected cells at any inoculating dose. Results are representative of 2 independent experiments.

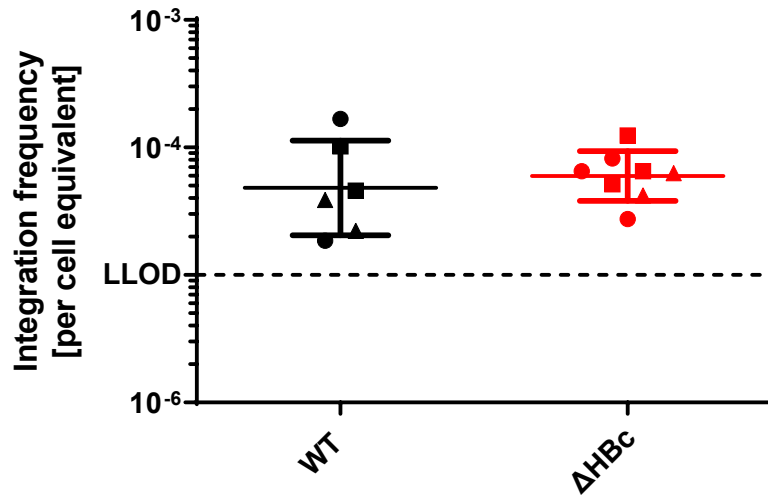

**Fig. S4. HBc expression is not required for the integration of HBV DNA**

Huh7-NTCP cells were infected with WT (black) or  $\Delta$ HBc (red) HBV at mge 200. The frequency of integrated HBV DNA at 5dpi was determined by inverse nested PCR and end-point titration. The results of 3 independent infections are shown (squares, circles, and triangles, line = mean  $\pm$  95% confidence interval). Each point represents the calculated integration frequency for a separate dilution factor of cellular DNA multiplied by number of integrations detected at that dilution by inverse nested PCR. LLOD = Lower limit of detection.

## **Supplementary references**

- [1] Berg S, Kutra D, Kroeger T, Straehle CN, Kausler BX, Haubold C, et al. ilastik: interactive machine learning for (bio)image analysis. *Nat Methods* 2019;16:1226-1232.
