# Supplementary material for: De novo synthesis of hepatitis B virus nucleocapsids is dispensable for the maintenance and transcriptional regulation of cccDNA
Source: PubMed Central journal article supplement — JHEP Rep. 2020 Oct 14;3(1):100195. doi: 10.1016/j.jhepr.2020.100195 (PMC7771110; doi:10.1016/j.jhepr.2020.100195), 2020-10-14
Supplement: mmc2.pdf [file mmc2.pdf]

## JHEP Reports

### CTAT methods

Tables for a “Complete, Transparent, Accurate and Timely account” (CTAT) are now mandatory for all revised submissions. The aim is to enhance the reproducibility of methods.

- Only include the parts relevant to your study
- Refer to the CTAT in the main text as ‘Supplementary CTAT Table’
- Do not add subheadings
- Add as many rows as needed to include all information
- Only include one item per row

#### 1.1 Antibodies

| Name                                                  | Citation | Supplier                          | Cat no.                      | Clone no.          |
|-------------------------------------------------------|----------|-----------------------------------|------------------------------|--------------------|
| Anti-HBcAg                                            | N/A      | DAKO                              | B0586                        | polyclonal         |
| Anti-HBsAg                                            | N/A      | Vir Biotechnology (HuMabs Biomed) | N/A (gift from Davide Corti) | HBC34 (monoclonal) |
| Alexa Fluor 488-conjugated goat anti-rabbit IgG (H+L) | N/A      | Invitrogen                        | A-11008                      | N/A                |
| Alexa Fluor 555-conjugated goat anti-human IgG (H+L)  | N/A      | Invitrogen                        | A-21433                      | N/A                |

#### 1.2 Cell lines

| Name                     | Citation                                            | Supplier                        | Cat no. | Passage no. | Authentication test method       |
|--------------------------|-----------------------------------------------------|---------------------------------|---------|-------------|----------------------------------|
| Primary human hepatocyte | Isolated as per Kleine <i>et al.</i> 2014, PLoS One | MHH Hannover                    | N/A     | Primary     | Visual inspection/cell phenotype |
| HepaRG-hNTCP             | Gripon <i>et al.</i> 2002, PNAS                     | In-house Uniklinikum Heidelberg | N/A     | <10         | STR                              |
| Huh7-NTCP                | Ni <i>et al.</i> 2014, Gastroenterology             | In-house Uniklinikum Heidelberg | N/A     | <20         | STR                              |
| HepG2-NTCP               | Ni <i>et al.</i> 2014, Gastroenterology             | In-house Uniklinikum Heidelberg | N/A     | <20         | STR                              |
| E.coli DH5 $\alpha$      | N/A                                                 | In-house                        | N/A     |             |                                  |

#### 1.3 Organisms

| Name | Citation | Supplier | Strain | Sex | Age | Overall n number |
|------|----------|----------|--------|-----|-----|------------------|
| N/A  |          |          |        |     |     |                  |

#### 1.4 Sequence based reagents

| Name                                       | Sequence                      | Supplier      |
|--------------------------------------------|-------------------------------|---------------|
| Forward primer for pgRNA and pre-core mRNA | CTCCTCCAGCTTATAGACC           | Eurofins GmbH |
| Reverse primer for pgRNA and pre-core mRNA | GTGAGTGGGCCTACAAA             | Eurofins GmbH |
| Forward primer for total HBV transcripts   | TCAGCAATGTCAACGACCGA          | Eurofins GmbH |
| Reverse primer for total HBV transcripts   | TGCGCAGACCAATTTATGCC          | Eurofins GmbH |
| Forward primer for cccDNA                  | CACTCTATGGAAGGCGGGTA          | Eurofins GmbH |
| Reverse primer for cccDNA                  | ATAAGGGTTCGATGTCCATGC         | Eurofins GmbH |
| Probe for cccDNA                           | FAM-AACACATAGCGCACCAGCA-BHQ1  | Eurofins GmbH |
| Forward primer for total HBV DNA           | GTGTCTGCGGCGTTTTATCA          | Eurofins GmbH |
| Reverse primer for total HBV DNA           | GACAAACGGGCAACATACCTT         | Eurofins GmbH |
| Probe for total HBV DNA                    | FAM-TGAGGCATAGCAGCAGGATG-BHQ1 | Eurofins GmbH |

## 1.5 Biological samples

| Description | Source | Identifier |
|-------------|--------|------------|
| N/A         |        |            |

## 1.6 Deposited data

| Name of repository | Identifier | Link |
|--------------------|------------|------|
| N/A                |            |      |

## 1.7 Software

| Software name             | Manufacturer                      | Version |
|---------------------------|-----------------------------------|---------|
| Adobe Illustrator         | Adobe Systems                     | 6.0     |
| Adobe Photoshop           | Adobe Systems                     | 6.0     |
| CFX Manager               | Bio-rad                           | 2.0     |
| CorelDRAW Graphics Suite  | Corel Cooperations                | X5      |
| Endnote                   | Clarivate Analytics               | X7      |
| ImageJ                    | National Institute of Health, USA | 1.52p   |
| GraphPad PRISM            | GraphPad, Inc.                    | 5       |
| Leica Application Suite X | Leica Inc.                        | 3.7.2   |
| Vector NTI software       | Life Technologies                 | 11      |

## 1.8 Other (e.g. drugs, proteins, vectors etc.)

|          |  |  |
|----------|--|--|
| pcDNA3.1 |  |  |
|----------|--|--|

|                             |  |  |
|-----------------------------|--|--|
| pHBV1.1 (wild-type genome)  |  |  |
| pHBV1.1-HBc <sup>stop</sup> |  |  |
| pHBc (genotype D)           |  |  |

**1.9 Please provide the details of the corresponding methods author for the manuscript:**

**Corresponding author for methods:**

Dr. Thomas Tu

Storr Liver Centre, Westmead Institute for Medical Research and University of Sydney,  
Sydney, Australia

+612-8627-3912

[t.tu@sydney.edu.au](mailto:t.tu@sydney.edu.au)

**2.0 Please confirm for randomised controlled trials all versions of the clinical protocol are included in the submission. These will be published online as supplementary information.**

We did not perform any clinical trials for this study.
